# Supplementary material for: DNA-based fabrication of density-controlled vertically aligned ZnO nanorod arrays and their SERS applications
Source: Royal Society of Chemistry journal article supplement (doi:10.1039/c1jm10830a), 2011-01-01
Supplement: c1jm10830a.pdf [file c1jm10830a.pdf]

## **Supporting Information**

**(Manuscript ID JM-ART-02-2011-010830)**

### **DNA-Based Fabrication of Density-Controlled Vertically Aligned ZnO Nanorod Arrays and Its SERS applications**

**Lanlan Sun, Dongxu Zhao\*, Zhenzhong Zhang, Binghui Li, Dezhen Shen**

Key Laboratory of Excited State Processes, Chinese Academy of Sciences,  
Changchun Institute of Optics, Fine Mechanics and Physics, Chinese Academy of  
Sciences, 16 East Nan-Hu Road, Open Economic Zone, Changchun 130033, People's  
Republic of China

\* To whom correspondence should be addressed. E-mail: dxzhao2000@yahoo.com.cn

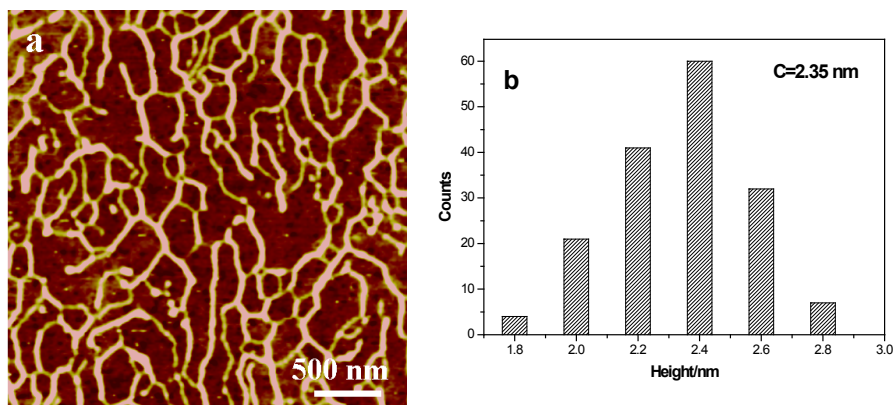

Figure S1 (a) Tapping mode AFM image of DNA networks on ITO surface after six times of  $\text{Zn}^{2+}$  wetting treatment, (b) corresponding height distribution histogram of AFM image of (a).

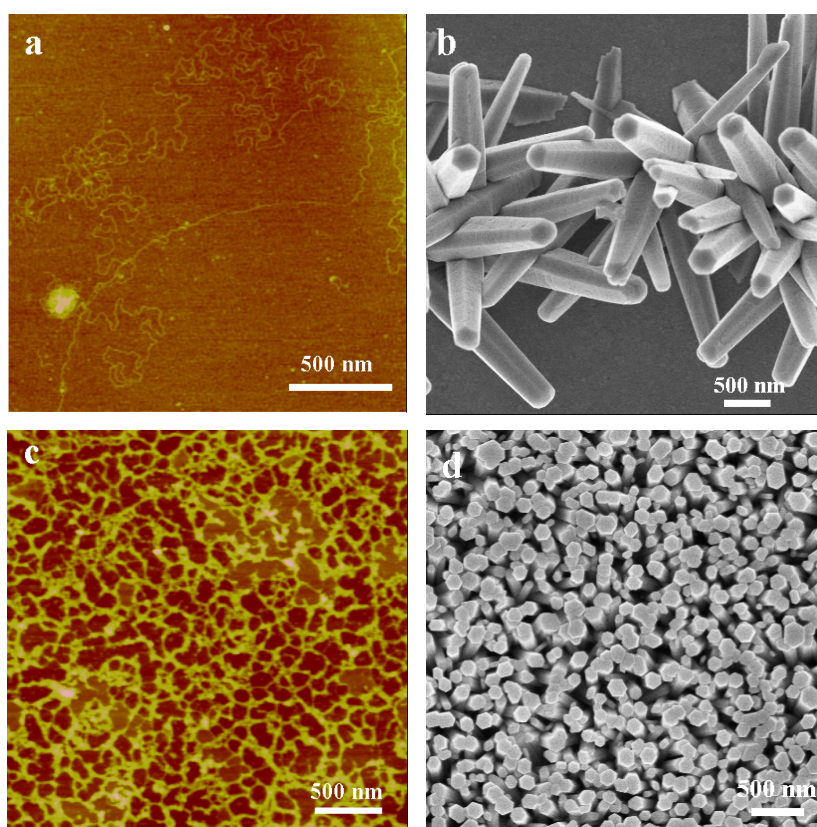

Figure S2 Tapping mode AFM images of DNA structures on ITO surface with various DNA concentration: (a) 5 and (c) 20  $\text{ng}/\mu\text{L}$ , (b) and (d) SEM images of correspondingly obtained ZnO NRs arrays.

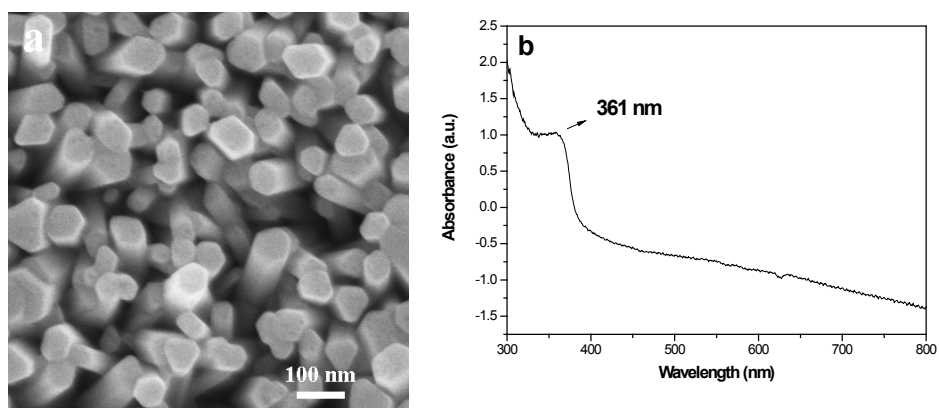

Figure S3 (a) SEM image and (b) UV-vis absorption spectrum of ZnO NRs grown on glass.

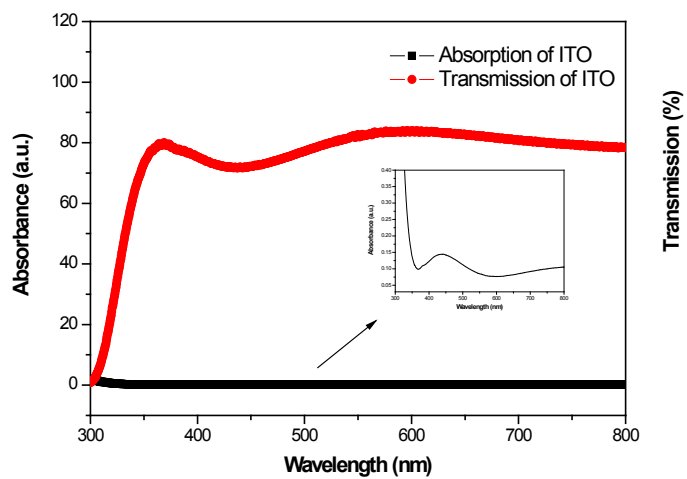

Figure S4 UV-vis absorption and transmission spectra of pure ITO slide.
